# Supplementary material
Source: PubMed Central journal article supplement (PMC3593910)

# Supporting Information

Bi et al. 10.1073/pnas.1218497110

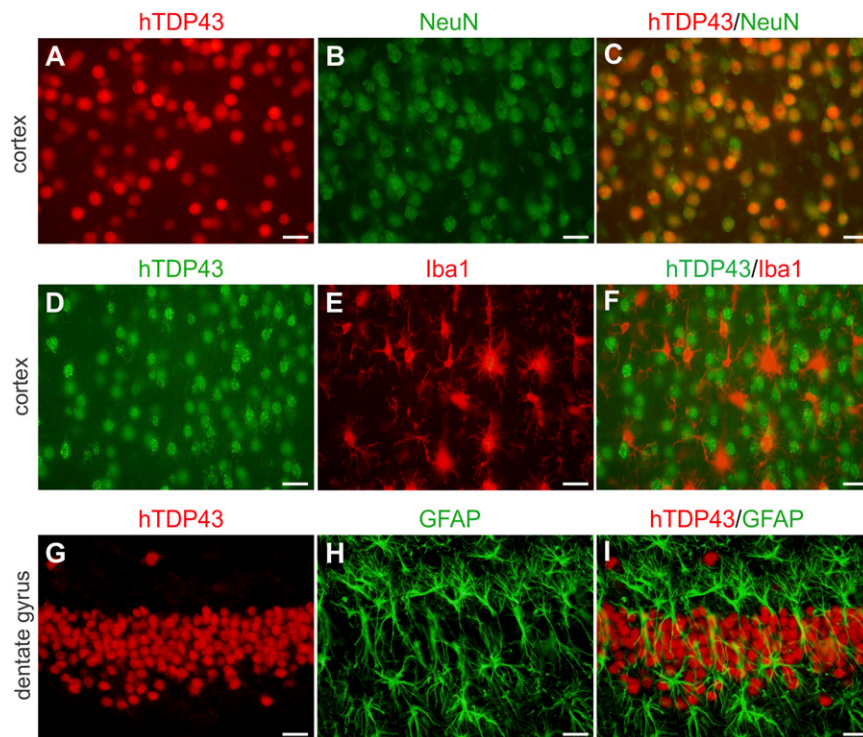

**Fig. S1.** Expression of mutant human TAR DNA-binding protein 43 (TDP-43) is restricted in neurons in the forebrain of transgenic rats. (A–I) Double-labeling fluorescence staining revealed that human TDP-43 with M337V substitution (hTDP43) colocalized with the neuronal marker NeuN (A–C) and did not colocalize with the microglial marker ionized calcium binding adaptor molecule 1 (Iba1) (D–F) or the astrocyte marker glial acid fibrillary protein (GFAP) (G–I). Tissues were taken from double-transgenic rats carrying both calcium/calmodulin-dependent protein kinase II  $\alpha$  (Camk2 $\alpha$ )-tetracycline responsive transactivator (tTA) and tetracycline-responsive element-TDP43<sup>M337V</sup> transgenes. The transgenic rats were continuously given doxycycline (Dox) in drinking water during embryonic and postnatal development and were permanently deprived of Dox by the age of 35 d. Expression of human TAR DNA-binding protein 43 was examined in transgenic rats at the age of 55 d. (Scale bar: 20  $\mu$ m.)

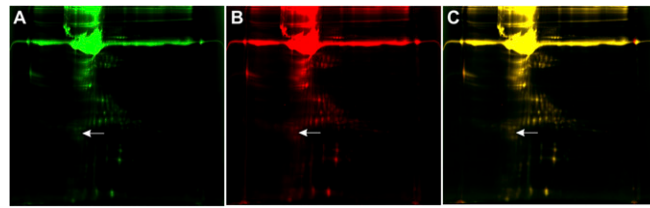

**Fig. S2.** Lipocalin 2 (lcn2) secretion is increased in the culture medium of brain slice from mutant TAR DNA-binding protein 43 (TDP-43) transgenic rats. (A–C) Two-dimensional gel and MS analyses revealed that the secretion of lcn2 from cultured brain slices was increased when mutant human TDP-43 was expressed in the neurons. The forebrains were dissected from P3 (postnatal day 3) male rats carrying Camk2 $\alpha$ -tTA single or Camk2 $\alpha$ -tTA/tetracycline-responsive element (TRE)-TDP43<sup>M337V</sup> double transgenes. Cy2 (A, green) labeled the proteins secreted by the brain slices of Camk2 $\alpha$ -tTA single-transgenic rats and Cy3 (B, red) labeled the proteins secreted by the brain slices of Camk2 $\alpha$ -tTA/TRE-TDP43<sup>M337V</sup> double-transgenic rats. (C) Merged data from (A and B). Rat's forebrains were cut into slices at 300- $\mu$ m intervals. The brain slices were cultured for 4 d in the presence of doxycycline (Dox) to allow for recovery from slicing and then were cultured in the medium without Dox to allow for expression of mutant human TDP-43 transgene in neurons. By 8 d in culture, rat's brain slices were cultured in serum-free medium for 24 h and the culture medium was collected for analysis of secreted proteins by 2D gel and MS. Total proteins in the culture medium were precipitated and were labeled with cyanine dye (Cy) 2 or Cy3. Equal amounts of proteins from two cultures were mixed after fluorescence labeling and were analyzed on 2D gel. Protein spots with increased intensity in TDP-43 transgenic culture were dissected from the gel and further analyzed of composition by MS. (Arrows) The spot for the secretory protein lcn2.

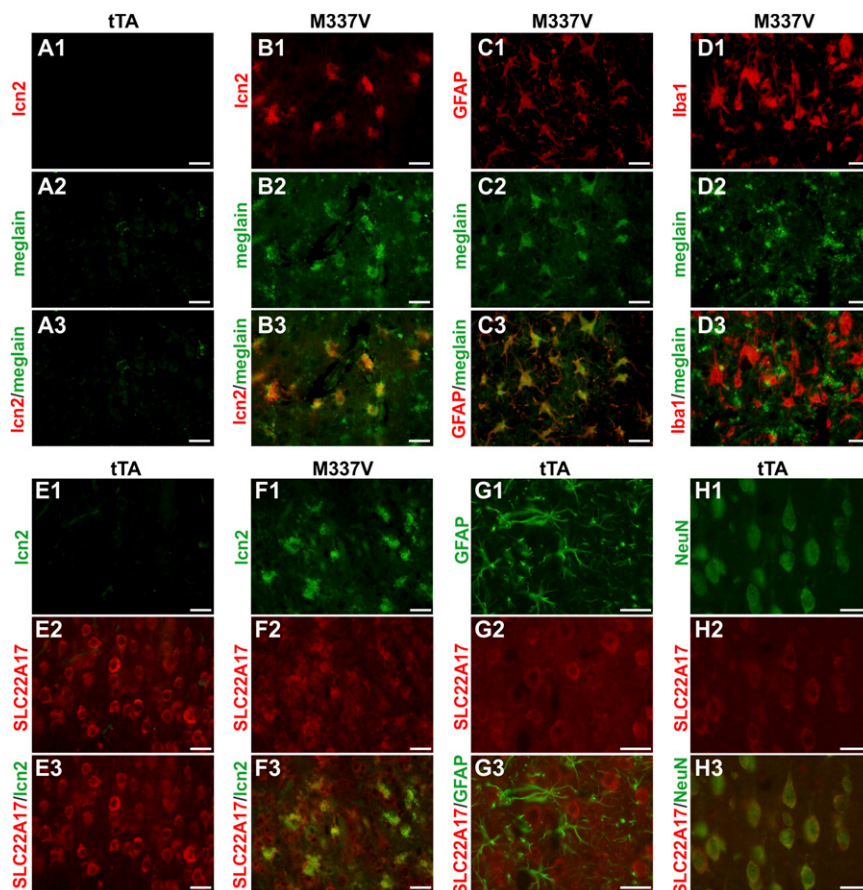

**Fig. S3.** Neurons and astrocytes express varying types of lipocalin 2 (lcn2) receptors. (A–D) Immunofluorescent staining revealed that megalin (a receptor of lcn2) was mainly expressed in reactive astrocytes in rat's brain. Coronal sections were cut from the forebrains of Camk2 $\alpha$ -tetracycline-responsive tTA or Camk2 $\alpha$ -tTA/tetracycline-responsive element-TAR DNA-binding protein 43 double (M337V)-transgenic rats at the age of 55 d. (E–H) Immunofluorescent staining revealed that solute carrier family 22 member 17 (SLC22A17) (another receptor of lcn2) was mainly expressed in normal neurons of WT rats (G1–G3 and H1–H3) but was also expressed in reactive astrocytes (F1–F3). (Scale bar: 40  $\mu$ m.)

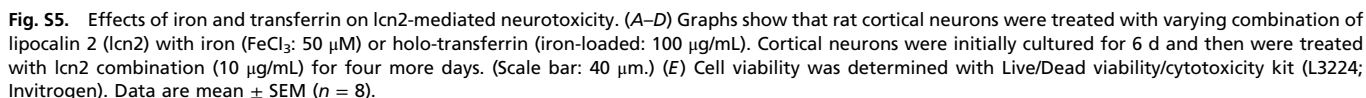

Supplement: 1218497110_pnas.201218497SI.pdf [file 1218497110_pnas.201218497SI.pdf]
